# Supplementary material
Source: ML conference proceedings conference paper supplement (https://proceedings.neurips.cc/paper_files/paper/2014/hash/f4573fc71c731d5c362f0d7860945b88-Abstract.html)
Supplement: Supplementary file [file f4573fc71c731d5c362f0d7860945b88-Supplemental.zip]

---

# Supplementary material for: Ensemble Estimation of Multivariate $f$ -Divergence

---

**Kevin R. Moon**  
 Department of EECS  
 University of Michigan  
 Ann Arbor, MI  
 krmoon@umich.edu

**Alfred O. Hero III**  
 Department of EECS  
 University of Michigan  
 Ann Arbor, MI  
 hero@eecs.umich.edu

## 1 Assumptions

We use the same assumptions on the densities and the functional as in [1] and [2]. They are

- (A.0): Assume that  $k_i = k_0 M_i^\beta$  with  $0 < \beta < 1$ , that  $M_2 = \alpha_{frac} T$  with  $0 < \alpha_{frac} < 1$ .
- (A.1): Assume there exist constants  $\epsilon_0, \epsilon_\infty$  such that  $0 < \epsilon_0 \leq f_i(x) \leq \epsilon_\infty < \infty, \forall x \in S$ .
- (A.2): Assume that the densities  $f_i$  have continuous partial derivatives of order  $d$  in the interior of  $S$  that are upper bounded.
- (A.3): Assume that  $g$  has derivatives  $g^{(j)}$  of order  $j = 1, \dots, \max\{\lambda, d\}$  where  $\lambda\beta > 1$ .
- (A.4): Assume that  $|g^{(j)}(f_1(x)/f_2(x))|, j = 0, \dots, \max\{\lambda, d\}$  are strictly upper bounded for  $\epsilon_0 \leq f_i(x) \leq \epsilon_\infty$ .
- (A.5): Let  $\epsilon \in (0, 1)$ ,  $\delta \in (2/3, 1)$ , and  $\mathcal{C}(k) = \exp(-3k^{(1-\delta)})$ . For fixed  $\epsilon$ , define  $p_{l,i} = (1 - \epsilon)\epsilon_0 \frac{k_i - 1}{M_i}$ ,  $p_{u,i} = (1 + \epsilon)\epsilon_\infty \frac{k_i - 1}{M_i}$ ,  $q_{l,i} = \frac{k_i - 1}{M_i \bar{c} D^d}$ , and  $q_{u,i} = (1 + \epsilon)\epsilon_\infty$  where  $D$  is the diameter of the support  $S$ . Let  $\mathbf{P}_i$  be a beta distributed random variable with parameters  $k_i$  and  $M_i - k_i + 1$ . Define  $p_l = \frac{p_{l,1}}{p_{u,2}}$  and  $p_u = \frac{p_{u,1}}{p_{l,2}}$ . Assume that for  $U(L) = g(L)$ ,  $g^{(3)}(L)$ , and  $g^{(\lambda)}(L)$ ,

$$\begin{aligned}
 & - (i) \mathbb{E} \left[ \sup_{L \in (p_l, p_u)} \left| U \left( L \frac{\mathbf{P}_2}{\mathbf{P}_1} \right) \right| \right] = G_1 < \infty, \\
 & - (ii) \sup_{L \in \left( \frac{q_{l,1}}{q_{u,2}}, \frac{q_{u,1}}{q_{l,2}} \right)} |U(L)| \mathcal{C}(k_1) \mathcal{C}(k_2) = G_2 < \infty, \\
 & - (iii) \mathbb{E} \left[ \sup_{L \in \left( \frac{q_{l,1}}{p_{u,2}}, \frac{q_{u,1}}{p_{l,2}} \right)} |U(L \mathbf{P}_2)| \mathcal{C}(k_1) \right] = G_3 < \infty, \\
 & - (iv) \mathbb{E} \left[ \sup_{L \in \left( \frac{p_{l,1}}{q_{u,2}}, \frac{p_{u,1}}{q_{l,2}} \right)} \left| U \left( \frac{L}{\mathbf{P}_1} \right) \right| \mathcal{C}(k_2) \right] = G_4 < \infty, \forall M_i.
 \end{aligned}$$

Densities for which assumptions (A.0) – (A.5) hold include the truncated Gaussian distribution and the Beta distribution on the unit cube. Functions for which the assumptions hold include  $g(L) = -\ln L$  and  $g(L) = L^\alpha$ .

## 2 Proof of Theorem 2

We use the following lemma which is proved in [3]:

**Lemma 1.** *Let the random variables  $\{\mathbf{Y}_{M,i}\}_{i=1}^N$  belong to a zero mean, unit variance, interchangeable process for all values of  $M$ . Assume that  $\text{Cov}(\mathbf{Y}_{M,1}, \mathbf{Y}_{M,2})$  and  $\text{Cov}(\mathbf{Y}_{M,1}^2, \mathbf{Y}_{M,2}^2)$  are*

$O(1/M)$ . Then the random variable

$$\mathbf{S}_{N,M} = \frac{\sum_{i=1}^N \mathbf{Y}_{M,i}}{\sqrt{\mathbb{V} \left[ \sum_{i=1}^N \mathbf{Y}_{M,i} \right]}} \quad (1)$$

converges in distribution to a standard normal random variable.

For simplicity, let  $M_1 = M_2 = M$  and  $\hat{\mathbf{L}}_{k(l)} := \hat{\mathbf{L}}_{k(l),k(l)}$ . Define

$$\mathbf{Y}_{M,i} = \frac{\sum_{l \in \bar{l}} w(l) g \left( \hat{\mathbf{L}}_{k(l)}(\mathbf{X}_i) \right) - \mathbb{E} \left[ \sum_{l \in \bar{l}} w(l) g \left( \hat{\mathbf{L}}_{k(l)}(\mathbf{X}_i) \right) \right]}{\sqrt{\mathbb{V} \left[ \sum_{l \in \bar{l}} w(l) g \left( \hat{\mathbf{L}}_{k(l)}(\mathbf{X}_i) \right) \right]}}.$$

Then from Eq. 1, we have that

$$\mathbf{S}_{N,M} = \frac{\hat{\mathbf{G}}_w - \mathbb{E} \left[ \hat{\mathbf{G}}_w \right]}{\sqrt{\mathbb{V} \left[ \hat{\mathbf{G}}_w \right]}}.$$

Thus it is sufficient to show from Lemma 1 that  $Cov(\mathbf{Y}_{M,1}, \mathbf{Y}_{M,2})$  and  $Cov(\mathbf{Y}_{M,1}^2, \mathbf{Y}_{M,2}^2)$  are  $O(1/M)$ . To do this, it is necessary to show that the denominator of  $\mathbf{Y}_{M,i}$  converges to a nonzero constant or to zero sufficiently slowly. Note that the numerator and denominator of  $\mathbf{Y}_{M,i}$  are, respectively,

$$\begin{aligned} & \sum_{l \in \bar{l}} w(l) g \left( \hat{\mathbf{L}}_{k(l)}(\mathbf{X}_i) \right) - \mathbb{E} \left[ \sum_{l \in \bar{l}} w(l) g \left( \hat{\mathbf{L}}_{k(l)}(\mathbf{X}_i) \right) \right] \\ &= \sum_{l \in \bar{l}} w(l) \left( g \left( \hat{\mathbf{L}}_{k(l)}(\mathbf{X}_i) \right) - \mathbb{E} \left[ g \left( \hat{\mathbf{L}}_{k(l)}(\mathbf{X}_i) \right) \right] \right), \end{aligned} \quad (2)$$

$$\begin{aligned} & \sqrt{\mathbb{V} \left[ \sum_{l \in \bar{l}} w(l) g \left( \hat{\mathbf{L}}_{k(l)}(\mathbf{X}_i) \right) \right]} \\ &= \sqrt{\sum_{l \in \bar{l}} \sum_{l' \in \bar{l}} w(l) w(l') Cov \left( g \left( \hat{\mathbf{L}}_{k(l)}(\mathbf{X}_i) \right), g \left( \hat{\mathbf{L}}_{k(l')}(\mathbf{X}_i) \right) \right)}. \end{aligned} \quad (3)$$

Therefore, to bound  $Cov(\mathbf{Y}_{M,1}, \mathbf{Y}_{M,2})$ , we require bounds on the quantity  $Cov \left[ g \left( \hat{\mathbf{L}}_{k(l)}(\mathbf{X}_i) \right), g \left( \hat{\mathbf{L}}_{k(l')}(\mathbf{X}_j) \right) \right]$ .

Some preliminary work is required before we can directly tackle this quantity. Define  $\mathcal{M}(\mathbf{Z}) := \mathbf{Z} - \mathbb{E}\mathbf{Z}$ ,  $\hat{\mathbf{F}}_{k(l)}(\mathbf{Z}) := \hat{\mathbf{L}}_{k(l)}(\mathbf{Z}) - \mathbb{E}\mathbf{Z} \left( \hat{\mathbf{L}}_{k(l)}(\mathbf{Z}) \right)$ , and  $\hat{\mathbf{e}}_{i,k(l)}(\mathbf{Z}) := \hat{\mathbf{f}}_{i,k(l)}(\mathbf{Z}) - \mathbb{E}\mathbf{Z} \hat{\mathbf{f}}_{i,k(l)}(\mathbf{Z})$ . By forming a Taylor series expansion of  $g \left( \hat{\mathbf{L}}_{k(l)}(\mathbf{Z}) \right)$  around  $\mathbb{E}\mathbf{Z} \hat{\mathbf{L}}_{k(l)}(\mathbf{Z})$ , we get

$$g \left( \hat{\mathbf{L}}_{k(l)}(\mathbf{Z}) \right) = \sum_{i=0}^{\lambda-1} \frac{g^{(i)} \left( \mathbb{E}\mathbf{Z} \hat{\mathbf{L}}_{k(l)}(\mathbf{Z}) \right)}{i!} \hat{\mathbf{F}}_{k(l)}^i(\mathbf{Z}) + \frac{g^{(\lambda)}(\xi_{\mathbf{Z}})}{\lambda!} \hat{\mathbf{F}}_{k(l)}^\lambda(\mathbf{Z}),$$

where  $\xi_{\mathbf{Z}} \in \left( \mathbb{E}\mathbf{Z} \hat{\mathbf{F}}_{k(l)}(\mathbf{Z}), \hat{\mathbf{F}}_{k(l)}(\mathbf{Z}) \right)$ . Let  $\Psi(\mathbf{Z}) = g^{(\lambda)}(\xi_{\mathbf{Z}}) / \lambda!$  and

$$\begin{aligned} \mathbf{p}_i^{(l)} &:= \mathcal{M} \left( g \left( \mathbb{E}_{\mathbf{X}_i} \hat{\mathbf{L}}_{k(l)}(\mathbf{X}_i) \right) \right), \\ \mathbf{q}_i^{(l)} &:= \mathcal{M} \left( g' \left( \mathbb{E}_{\mathbf{X}_i} \hat{\mathbf{L}}_{k(l)}(\mathbf{X}_i) \right) \hat{\mathbf{F}}_{k(l)}(\mathbf{X}_i) \right), \\ \mathbf{r}_i^{(l)} &:= \mathcal{M} \left( \sum_{j=2}^{\lambda-1} \frac{g^{(j)} \left( \mathbb{E}_{\mathbf{X}_i} \hat{\mathbf{L}}_{k(l)}(\mathbf{X}_i) \right)}{j!} \hat{\mathbf{F}}_{k(l)}^j(\mathbf{X}_i) \right), \\ \mathbf{s}_i^{(l)} &:= \mathcal{M} \left( \Psi(\mathbf{X}_i) \hat{\mathbf{F}}_{k(l)}^\lambda(\mathbf{X}_i) \right). \end{aligned}$$

Then

$$\begin{aligned} & \text{Cov} \left[ g \left( \hat{\mathbf{L}}_{k(l)}(\mathbf{X}_i) \right), g \left( \hat{\mathbf{L}}_{k(l')}(\mathbf{X}_j) \right) \right] \\ &= \mathbb{E} \left[ \left( \mathbf{p}_i^{(l)} + \mathbf{q}_i^{(l)} + \mathbf{r}_i^{(l)} + \mathbf{s}_i^{(l)} \right) \left( \mathbf{p}_j^{(l')} + \mathbf{q}_j^{(l')} + \mathbf{r}_j^{(l')} + \mathbf{s}_j^{(l')} \right) \right]. \end{aligned} \quad (4)$$

To obtain expressions for  $\hat{\mathbf{F}}_{k(l)}^i(\mathbf{Z})$ , we expand  $\hat{\mathbf{L}}_{k(l)}(\mathbf{Z})$  around  $\mathbb{E}_{\mathbf{Z}} \hat{\mathbf{f}}_{1,k(l)}(\mathbf{Z})$  and  $\mathbb{E}_{\mathbf{Z}} \hat{\mathbf{f}}_{2,k(l)}(\mathbf{Z})$ :

$$\begin{aligned} \frac{\hat{\mathbf{f}}_{1,k(l)}(\mathbf{Z})}{\hat{\mathbf{f}}_{2,k(l)}(\mathbf{Z})} &= \frac{\mathbb{E}_{\mathbf{Z}} \hat{\mathbf{f}}_{1,k(l)}(\mathbf{Z})}{\mathbb{E}_{\mathbf{Z}} \hat{\mathbf{f}}_{2,k(l)}(\mathbf{Z})} + \frac{\hat{\mathbf{e}}_{1,k(l)}(\mathbf{Z})}{\mathbb{E}_{\mathbf{Z}} \hat{\mathbf{f}}_{2,k(l)}(\mathbf{Z})} - \mathbb{E}_{\mathbf{Z}} \hat{\mathbf{f}}_{1,k(l)}(\mathbf{Z}) \frac{\hat{\mathbf{e}}_{2,k(l)}(\mathbf{Z})}{\left( \mathbb{E}_{\mathbf{Z}} \hat{\mathbf{f}}_{2,k(l)}(\mathbf{Z}) \right)^2} \\ &\quad - \frac{\hat{\mathbf{e}}_{1,k(l)}(\mathbf{Z}) \hat{\mathbf{e}}_{2,k(l)}(\mathbf{Z})}{\left( \mathbb{E}_{\mathbf{Z}} \hat{\mathbf{f}}_{2,k(l)}(\mathbf{Z}) \right)^2} + \mathbb{E}_{\mathbf{Z}} \hat{\mathbf{f}}_{1,k(l)}(\mathbf{Z}) \frac{\hat{\mathbf{e}}_{2,k(l)}^2(\mathbf{Z})}{2 \left( \mathbb{E}_{\mathbf{Z}} \hat{\mathbf{f}}_{2,k(l)}(\mathbf{Z}) \right)^3} \\ &\quad + \frac{\hat{\mathbf{e}}_{1,k(l)}(\mathbf{Z}) \hat{\mathbf{e}}_{2,k(l)}^2(\mathbf{Z})}{2 \left( \mathbb{E}_{\mathbf{Z}} \hat{\mathbf{f}}_{2,k(l)}(\mathbf{Z}) \right)^3} + o \left( \hat{\mathbf{e}}_{2,k(l)}^2(\mathbf{Z}) + \hat{\mathbf{e}}_{1,k(l)}(\mathbf{Z}) \hat{\mathbf{e}}_{2,k(l)}^2(\mathbf{Z}) \right) \\ &= \frac{\mathbb{E}_{\mathbf{Z}} \hat{\mathbf{f}}_{1,k(l)}(\mathbf{Z})}{\mathbb{E}_{\mathbf{Z}} \hat{\mathbf{f}}_{2,k(l)}(\mathbf{Z})} + h(\hat{\mathbf{e}}_{1,k(l)}(\mathbf{Z}), \hat{\mathbf{e}}_{2,k(l)}(\mathbf{Z})). \end{aligned} \quad (5)$$

Let  $\mathbf{h}(\mathbf{Z}) = h(\hat{\mathbf{e}}_{1,k(l)}(\mathbf{Z}), \hat{\mathbf{e}}_{2,k(l)}(\mathbf{Z}))$ . Thus  $\hat{\mathbf{F}}_{k(l)}(\mathbf{Z}) = \frac{\mathbb{E}_{\mathbf{Z}} \hat{\mathbf{f}}_{1,k(l)}(\mathbf{Z})}{\mathbb{E}_{\mathbf{Z}} \hat{\mathbf{f}}_{2,k(l)}(\mathbf{Z})} - \mathbb{E}_{\mathbf{Z}} \hat{\mathbf{L}}_{k(l)}(\mathbf{Z}) + \mathbf{h}(\mathbf{Z})$ . By the binomial theorem,

$$\hat{\mathbf{F}}_{k(l)}^q(\mathbf{Z}) = \sum_{j=0}^q a_{q,j} \left( \frac{\mathbb{E}_{\mathbf{Z}} \hat{\mathbf{f}}_{1,k(l)}(\mathbf{Z})}{\mathbb{E}_{\mathbf{Z}} \hat{\mathbf{f}}_{2,k(l)}(\mathbf{Z})} - \mathbb{E}_{\mathbf{Z}} \hat{\mathbf{L}}_{k(l)}(\mathbf{Z}) \right)^{q-j} \mathbf{h}^j(\mathbf{Z}), \quad (6)$$

where  $a_{q,j}$  is the binomial coefficient. Using a Taylor series expansion of  $\frac{1}{x}$  about  $\mathbb{E}_{\mathbf{Z}} \hat{\mathbf{f}}_{2,k_2}(\mathbf{Z})$ ,

$$\begin{aligned} \mathbb{E}_{\mathbf{Z}} \frac{1}{\hat{\mathbf{f}}_{2,k_2}(\mathbf{Z})} &= \mathbb{E}_{\mathbf{Z}} \left[ \frac{1}{\mathbb{E}_{\mathbf{Z}} \hat{\mathbf{f}}_{2,k_2}(\mathbf{Z})} - \frac{\hat{\mathbf{e}}_{2,k_2}}{\left( \mathbb{E}_{\mathbf{Z}} \hat{\mathbf{f}}_{2,k_2}(\mathbf{Z}) \right)^2} + \frac{\hat{\mathbf{e}}_{2,k_2}^2}{2 \xi_{2,\mathbf{Z}}} \right] \\ &= \frac{1}{\mathbb{E}_{\mathbf{Z}} \hat{\mathbf{f}}_{2,k_2}(\mathbf{Z})} + \frac{\left( \mathbb{V}_{\mathbf{Z}} \left[ \hat{\mathbf{f}}_{2,k_2}(\mathbf{Z}) \right] \right)}{2 \xi_{2,\mathbf{Z}}} \\ &= \frac{1}{\mathbb{E}_{\mathbf{Z}} \hat{\mathbf{f}}_{2,k_2}(\mathbf{Z})} + c_{3,2}(\mathbf{Z}) \left( \frac{1}{k_2} \right), \end{aligned} \quad (7)$$

where  $\xi_{2,\mathbf{Z}} \in \left( \mathbb{E}_{\mathbf{Z}} \hat{\mathbf{f}}_{2,k_2}(\mathbf{Z}), \hat{\mathbf{f}}_{2,k_2}(\mathbf{Z}) \right)$  from the mean value theorem and we use the fact that the variance of the kernel density estimate converges to zero with rate  $\frac{1}{M\sigma}$  where  $\sigma = O \left( \frac{k(l)}{M} \right)$ . Sricharan et al [4] showed that for a truncated uniform kernel density estimator with bandwidth  $(k/M)^{1/d}$ ,  $\mathbb{E}_{\mathbf{Z}} \hat{\mathbf{f}}_{i,k(l)}(\mathbf{Z}) = f_i(\mathbf{Z}) + \sum_{j=1}^d c_{i,j,k(l)}(\mathbf{Z}) \left( \frac{k(l)}{M} \right)^{j/d} + o \left( \frac{k(l)}{M} \right) = f_i(\mathbf{Z}) + c_{1,i}(\mathbf{Z}, k(l), M) = f_i(\mathbf{Z}) + o(1)$ . It can then be shown that the  $k$ -nn density estimator converges to a truncated uniform kernel density estimator [5]. Thus the result holds for the  $k$ -nn density estimator as well. Combining

this with Eq. 7 gives

$$\begin{aligned} & \left( \frac{\mathbb{E}_{\mathbf{Z}} \hat{\mathbf{f}}_{1,k(l)}(\mathbf{Z})}{\mathbb{E}_{\mathbf{Z}} \hat{\mathbf{f}}_{2,k(l)}(\mathbf{Z})} - \mathbb{E}_{\mathbf{Z}} \hat{\mathbf{L}}_{k_1,k_2}(\mathbf{Z}) \right)^q \\ &= \left( \mathbb{E}_{\mathbf{Z}} \hat{\mathbf{f}}_{1,k(l)}(\mathbf{Z}) c_{3,2}(\mathbf{Z}) \left( \frac{1}{k(l)} \right) \right)^q \end{aligned} \quad (8)$$

$$\begin{aligned} &= \left( f_1(\mathbf{Z}) c_{3,2}(\mathbf{Z}) \left( \frac{1}{k(l)} \right) + \sum_{j=1}^d c_{1,j,k(l)} \left( \frac{k(l)}{M} \right)^{\frac{j}{d}} \left( \frac{1}{k(l)} \right) + o \left( \frac{1}{M} \right) \right)^q \\ &= 1_{\{q=1\}} c_3(\mathbf{Z}) \left( \frac{1}{k(l)} \right) + 1_{\{q \geq 2\}} O \left( \frac{1}{k(l)^q} \right) + o \left( \frac{1}{M} \right) =: b_{q,k(l)}(\mathbf{Z}). \end{aligned} \quad (9)$$

Combining Eqs. 5, 6, and 9 gives

$$\begin{aligned} \hat{\mathbf{F}}_{k(l)}^q(\mathbf{Z}) &= b_{q,k(l)}(\mathbf{Z}) + b_{q-1,k(l)}^{1_{\{q \geq 2\}}}(\mathbf{Z}) a_{q,1} \mathbf{h}(\mathbf{Z}) + 1_{\{q \geq 2\}} b_{q-2,k(l)}^{1_{\{q \geq 3\}}}(\mathbf{Z}) a_{q,2} \mathbf{h}^2(\mathbf{Z}) \\ &\quad + 1_{\{q \geq 3\}} b_{q-3,k(l)}^{1_{\{q \geq 4\}}}(\mathbf{Z}) O(\mathbf{h}^3(\mathbf{Z})) \end{aligned} \quad (10)$$

where

$$\begin{aligned} \mathbf{h}(\mathbf{Z}) &= \frac{\hat{\mathbf{e}}_{1,k(l)}(\mathbf{Z})}{\mathbb{E}_{\mathbf{Z}} \hat{\mathbf{f}}_{2,k(l)}(\mathbf{Z})} - \frac{\mathbb{E}_{\mathbf{Z}} \hat{\mathbf{f}}_{1,k(l)}(\mathbf{Z})}{\left( \mathbb{E}_{\mathbf{Z}} \hat{\mathbf{f}}_{2,k(l)}(\mathbf{Z}) \right)^2} \hat{\mathbf{e}}_{2,k(l)}(\mathbf{Z}) - \frac{\hat{\mathbf{e}}_{1,k(l)}(\mathbf{Z}) \hat{\mathbf{e}}_{2,k(l)}(\mathbf{Z})}{\left( \mathbb{E}_{\mathbf{Z}} \hat{\mathbf{f}}_{2,k(l)}(\mathbf{Z}) \right)^2} \\ &\quad + \frac{\mathbb{E}_{\mathbf{Z}} \hat{\mathbf{f}}_{1,k(l)}(\mathbf{Z})}{2 \left( \mathbb{E}_{\mathbf{Z}} \hat{\mathbf{f}}_{2,k(l)}(\mathbf{Z}) \right)^3} \hat{\mathbf{e}}_{2,k(l)}^2(\mathbf{Z}) + o \left( \hat{\mathbf{e}}_{2,k(l)}^2(\mathbf{Z}) \right), \\ \mathbf{h}^2(\mathbf{Z}) &= \frac{\hat{\mathbf{e}}_{1,k(l)}^2(\mathbf{Z})}{\left( \mathbb{E}_{\mathbf{Z}} \hat{\mathbf{f}}_{2,k(l)}(\mathbf{Z}) \right)^2} + \frac{\left( \mathbb{E}_{\mathbf{Z}} \hat{\mathbf{f}}_{1,k(l)}(\mathbf{Z}) \right)^2}{\left( \mathbb{E}_{\mathbf{Z}} \hat{\mathbf{f}}_{2,k(l)}(\mathbf{Z}) \right)^4} \hat{\mathbf{e}}_{2,k(l)}^2(\mathbf{Z}) \\ &\quad + O \left( \hat{\mathbf{e}}_{1,k(l)}(\mathbf{Z}) \hat{\mathbf{e}}_{2,k(l)}(\mathbf{Z}) + \hat{\mathbf{e}}_{2,k(l)}^3(\mathbf{Z}) \right), \\ O(\mathbf{h}^3(\mathbf{Z})) &= O \left( \hat{\mathbf{e}}_{1,k(l)}^3(\mathbf{Z}) + \hat{\mathbf{e}}_{2,k(l)}^3(\mathbf{Z}) + \hat{\mathbf{e}}_{1,k(l)}^2(\mathbf{Z}) \hat{\mathbf{e}}_{2,k(l)}^2(\mathbf{Z}) \right). \end{aligned}$$

We now obtain bounds on the expected value of products of the  $\hat{\mathbf{e}}_{i,k(l)}$  terms:

**Lemma 2.** *Let  $l, l' \in \bar{l}$  be fixed,  $M_1 = M_2 = M$ , and  $k(l) = l\sqrt{M}$ . Let  $\gamma(z)$  be an arbitrary function with  $\sup_z |\gamma(z)| < \infty$ . Let  $\mathbf{Z}$  be a realization of the density  $f_2$  independent of  $\hat{\mathbf{f}}_{i,k(l)}$  and  $\hat{\mathbf{f}}_{i,k(l')}$  for  $i = 1, 2$ . Then,*

$$\mathbb{E} \left[ \gamma(\mathbf{Z}) \hat{\mathbf{e}}_{i,k(l)}^q(\mathbf{Z}) \right] = \begin{cases} 1_{\{q=2\}} \left( c_{2,i}(\gamma(z)) \left( \frac{1}{k(l)} \right) + o \left( \frac{1}{k(l)} \right) \right) + 1_{\{q \geq 3\}} O \left( \frac{1}{k(l)^{\frac{q}{2}}} \right), & q \geq 2 \\ 0, & q = 1, \end{cases} \quad (11)$$

$$\mathbb{E} \left[ \gamma(\mathbf{Z}) \hat{\mathbf{e}}_{i,k(l)}^q(\mathbf{Z}) \hat{\mathbf{e}}_{i,k(l')}^r(\mathbf{Z}) \right] = \begin{cases} O \left( \frac{1}{k(l)^{\frac{q}{2}} k(l')^{\frac{r}{2}}} \right), & q + r \geq 2 \\ 0, & \text{otherwise} \end{cases} \quad (12)$$

$$\begin{aligned} & \mathbb{E} \left[ \gamma(\mathbf{Z}) \hat{\mathbf{e}}_{1,k(l)}^q(\mathbf{Z}) \hat{\mathbf{e}}_{1,k(l')}^{q'}(\mathbf{Z}) \hat{\mathbf{e}}_{2,k(l)}^r(\mathbf{Z}) \hat{\mathbf{e}}_{2,k(l')}^{r'}(\mathbf{Z}) \right] \\ &= \begin{cases} 0, & q + q' = 1 \text{ or } r + r' = 1 \\ O \left( \frac{1}{k(l)^{\frac{q+r}{2}} k(l')^{\frac{q'+r'}{2}}} \right), & \text{otherwise} \end{cases} \end{aligned} \quad (13)$$

$$\mathbb{E} \left[ \gamma(\mathbf{Z}) \hat{\mathbf{F}}_{k(l)}^q(\mathbf{Z}) \right] = 1_{\{q=1\}} O \left( \frac{1}{k(l)} \right) + 1_{\{q \geq 2\}} O \left( \frac{1}{k(l)^{\frac{q}{2}}} \right). \quad (14)$$

*Proof.* For  $i = 2$ , Eq. 11 is given and proved as Lemma 5 in [4] where the density estimator is a truncated uniform kernel density estimator with bandwidth  $(k(l)/M)^{1/d}$ . The proof uses concentration inequalities to bound  $\mathbb{E}_{\mathbf{Z}} \hat{\mathbf{e}}_{2,k(l)}^q(\mathbf{Z})$  in terms of  $k(l)$ . Then since the truncated uniform kernel density estimator converges to the  $k$ -nn estimator, it holds for the  $k$ -nn estimator as well. For  $i = 1$ , the proof follows the same procedure but results in a different constant.

Equation 12 is proved in a similar manner. Let  $S_l(X) := \left\{ Y \in \mathcal{S} : \|X - Y\|_\infty \leq (k(l)/M)^{1/d}/2 \right\}$ ,  $V_l(X) := \int_{S_l(X)} dz$ ,  $U_{i,l}(X) := \Pr(\mathbf{Z} \in S_l(X))$  where  $\mathbf{Z}$  is drawn from  $f_i$ , and  $\mathbf{1}_{i,l}(X)$  denote the number of samples from the  $i$ th distribution that fall in  $S_l(X)$ ; i.e. the number of samples from  $\{\mathbf{Y}_1, \dots, \mathbf{Y}_M\}$  if  $i = 1$  or  $\{\mathbf{X}_{N+1}, \dots, \mathbf{X}_{N+M}\}$  if  $i = 2$  that fall in  $S_l(X)$ . The uniform kernel density estimator is then

$$\tilde{\mathbf{f}}_{i,k(l)}(X) = \frac{\mathbf{1}_{i,l}(X)}{MV_l(X)}.$$

Let  $\mathfrak{h}_{i,l}(X)$  denote the event  $(1 - p_{k(l)})MU_{i,l}(X) < \mathbf{1}_{i,l}(X) < (1 + p_{k(l)})MU_{i,l}(X)$ , where  $p_{k(l)} = 1/k(l)^{\delta/2}$ . It can be shown [4] using standard Chernoff inequalities that  $\Pr(\mathfrak{h}_{i,l}^C(X)) = O\left(e^{-p_{k(l)}^2 k(l)}\right)$  and that under the event  $\mathfrak{h}_{i,l}(X)$ ,  $\hat{\mathbf{e}}_{i,k(l)} = O(1/(k^{\delta/2}))$ . Thus

$$\begin{aligned} \mathbb{E} \left[ \gamma(\mathbf{Z}) \hat{\mathbf{e}}_{i,k(l)}^q(\mathbf{Z}) \hat{\mathbf{e}}_{i,k(l')}^r(\mathbf{Z}) \right] &= \mathbb{E} \left[ \gamma(\mathbf{Z}) \mathbf{1}_{\mathfrak{h}_{i,l}(X) \cap \mathfrak{h}_{i,l'}(X)} \hat{\mathbf{e}}_{i,k(l)}^q(\mathbf{Z}) \hat{\mathbf{e}}_{i,k(l')}^r(\mathbf{Z}) \right] \\ &\quad + \mathbb{E} \left[ \gamma(\mathbf{Z}) \mathbf{1}_{\{\mathfrak{h}_{i,l}(X) \cap \mathfrak{h}_{i,l'}(X)\}^C} \hat{\mathbf{e}}_{i,k(l)}^q(\mathbf{Z}) \hat{\mathbf{e}}_{i,k(l')}^r(\mathbf{Z}) \right] \\ &= O\left(\frac{1}{k(l)^{\frac{q}{2}} k(l')^{\frac{r}{2}}}\right), \end{aligned}$$

where we use the fact that  $\delta$  can be chosen arbitrarily close to 1.

For Eq. 13, note that due to conditional independence and Eq. 12,

$$\begin{aligned} &\mathbb{E} \left[ \gamma(\mathbf{Z}) \hat{\mathbf{e}}_{1,k(l)}^q(\mathbf{Z}) \hat{\mathbf{e}}_{1,k(l')}^{q'}(\mathbf{Z}) \hat{\mathbf{e}}_{2,k(l)}^r(\mathbf{Z}) \hat{\mathbf{e}}_{2,k(l')}^{r'}(\mathbf{Z}) \right] \\ &= \mathbb{E} \left[ \gamma(\mathbf{Z}) \mathbb{E}_{\mathbf{Z}} \left[ \hat{\mathbf{e}}_{1,k(l)}^q(\mathbf{Z}) \hat{\mathbf{e}}_{1,k(l')}^{q'}(\mathbf{Z}) \right] \mathbb{E}_{\mathbf{Z}} \left[ \hat{\mathbf{e}}_{2,k(l)}^r(\mathbf{Z}) \hat{\mathbf{e}}_{2,k(l')}^{r'}(\mathbf{Z}) \right] \right] \\ &= \mathbb{E} \left[ \gamma(\mathbf{Z}) \left( O\left(\frac{1}{k(l)^{\frac{q+r}{2}} k(l')^{\frac{q'+r'}{2}}}\right) \right) \right] \\ &= O\left(\frac{1}{k(l)^{\frac{q+r}{2}} k(l')^{\frac{q'+r'}{2}}}\right). \end{aligned}$$

Equation 14 is obtained by applying Eqs. 11 and 12 to Eq. 10.  $\square$

The following lemma provides bounds on the covariance between the  $\hat{\mathbf{F}}_{k(l)}^q(\mathbf{Z})$  terms:

**Lemma 3.** *Let  $l, l' \in \bar{l}$  be fixed,  $M_1 = M_2 = M$ , and  $k(l) = l\sqrt{M}$ . Let  $\gamma_1(x), \gamma_2(x)$  be arbitrary functions with 1 partial derivative wrt  $x$  and  $\sup_x |\gamma_i(x)| < \infty$ ,  $i = 1, 2$ . Let  $\mathbf{X}_i$  and  $\mathbf{X}_j$  be realizations of the density  $f_2$  independent of  $\hat{\mathbf{f}}_{1,k(l)}, \hat{\mathbf{f}}_{1,k(l')}, \hat{\mathbf{f}}_{2,k(l)}$ , and  $\hat{\mathbf{f}}_{2,k(l')}$  and independent of each other when  $i \neq j$ . Then*

$$\text{Cov} \left[ \gamma_1(\mathbf{X}_i) \hat{\mathbf{F}}_{k(l)}^q(\mathbf{X}_i), \gamma_2(\mathbf{X}_j) \hat{\mathbf{F}}_{k(l')}^r(\mathbf{X}_j) \right] = \begin{cases} o(1), & i = j \\ 1_{\{q=1, r=1\}} c_8(\gamma_1(x), \gamma_2(x)) \left(\frac{1}{M}\right) + o\left(\frac{1}{M}\right), & i \neq j. \end{cases}$$

*Proof.* Throughout the following, assume that  $\mathbf{X}$  and  $\mathbf{Y}$  are realizations of the density  $f_2$  independent of each other and  $\hat{\mathbf{f}}_{1,k(l)}, \hat{\mathbf{f}}_{1,k(l')}, \hat{\mathbf{f}}_{2,k(l)}$ , and  $\hat{\mathbf{f}}_{2,k(l')}$ . First consider the case where  $i = j$ . By Cauchy-Schwarz and Eq. 11,

$$\text{Cov} \left[ \gamma_1(\mathbf{X}) \hat{\mathbf{e}}_{i,k(l)}^q(\mathbf{X}), \gamma_2(\mathbf{X}) \hat{\mathbf{e}}_{i,k(l')}^r(\mathbf{X}) \right] = O\left(\frac{1}{M^{\frac{q+r}{4}}}\right). \quad (15)$$

By Eq. 12 and Eq. 13,

$$\text{Cov} \left[ \gamma_1(\mathbf{X}) \hat{\mathbf{e}}_{1,k(l)}^q(\mathbf{X}) \hat{\mathbf{e}}_{2,k(l)}^r(\mathbf{X}), \gamma_2(\mathbf{X}) \hat{\mathbf{e}}_{1,k(l')}^{q'}(\mathbf{X}) \hat{\mathbf{e}}_{2,k(l')}^{r'}(\mathbf{X}) \right] = O \left( \frac{1}{M^{\frac{q+r+q'+r'}{4}}} \right). \quad (16)$$

Applying Eqs. 15 and 16 to Eq. 10 completes the proof for this case.

We'll now prove the case where  $i \neq j$ . Define  $\Psi(l, l') = \left\{ \|X - Y\|_1 \geq 2 \left( \frac{\max(k(l), k(l'))}{M} \right)^{\frac{1}{d}} \right\}$ .

For a fixed pair of points  $\{X, Y\} \in \Psi(l, l')$ ,

$$\text{Cov} \left[ \hat{\mathbf{e}}_{i,k(l)}^q(X), \hat{\mathbf{e}}_{i,k(l')}^r(Y) \right] = 1_{\{q=r=1\}} \left( \frac{-f_i(X)f_i(Y)}{M} \right) + o \left( \frac{1}{M} \right). \quad (17)$$

This can be shown in the same way as in the proof of Lemma 6 in [4] for a truncated uniform kernel density estimator. This is done by recognizing that for  $\{X, Y\} \in \Psi(l, l')$ , the functions  $\mathbf{1}_{i,l}(X)$  and  $\mathbf{1}_{i,l'}(Y)$  are distributed jointly as a multinomial random variable with parameters  $M$ ,  $U_{i,l}(X)$ ,  $U_{i,l'}(Y)$  and  $1 - U_{i,l}(X) - U_{i,l'}(Y)$ . Equation 17 is then established by using the concentration inequality for the high probability event of  $\mathfrak{h}_{i,l}(X) \cap \mathfrak{h}_{i,l'}(Y)$  and then relating the functions  $\mathbf{1}_{i,l}(X)$  and  $\mathbf{1}_{i,l'}(Y)$  to two binomial random variables with parameters  $\{U_{i,l}(X), M - q\}$  and  $\{U_{i,l'}(Y), M - r\}$ , respectively. Note that the relationship holds whether  $l = l'$  or  $l \neq l'$ . For fixed  $\{X, Y\} \in \Psi(l, l')^C$ , Cauchy-Schwarz and Eq. 11 give

$$\text{Cov} \left[ \hat{\mathbf{e}}_{i,k(l)}^q(X), \hat{\mathbf{e}}_{i,k(l')}^r(Y) \right] = O \left( \frac{1}{k(l)^{\frac{q}{2}} k(l')^{\frac{r}{2}}} \right). \quad (18)$$

From Eqs. 17 and 18, we have that

$$\text{Cov} \left[ \gamma_1(\mathbf{X}) \hat{\mathbf{e}}_{i,k(l)}^q(\mathbf{X}), \gamma_2(\mathbf{Y}) \hat{\mathbf{e}}_{i,k(l')}^r(\mathbf{Y}) \right] = 1_{\{q=r=1\}} c_{7,i}(\gamma_1(x), \gamma_2(x)) \left( \frac{1}{M} \right) + o \left( \frac{1}{M} \right). \quad (19)$$

This is proved in the same way as in the proof of Lemma 8 in [4] by splitting the covariances into the cases where  $\{\mathbf{X}, \mathbf{Y}\} \in \Psi(l, l')$  and  $\{\mathbf{X}, \mathbf{Y}\} \in \Psi(l, l')^C$ . For the first case, the bound falls clearly from Eq. 17. For the second case, the bound holds with Eq. 18 since  $\int_{\Psi(l, l')^C} dy = 2^d \frac{\max(k(l), k(l'))}{M}$ .

Now let  $E_0 = \{s, q, t, r \geq 1\}$ ,  $E_{1,1} = \{s = 0, q \geq 2, t \geq 1, r \geq 1\} \cup \{s \geq 1, q \geq 1, t = 0, r \geq 2\}$ , and  $E_{1,2} = \{s \geq 2, q = 0, t \geq 1, r \geq 1\} \cup \{s \geq 1, q \geq 1, t \geq 2, r = 0\}$ . For fixed  $X, Y$ , we have by Eqs. 11 and 12 and conditional independence when  $E_0$ ,  $E_{1,1}$ , or  $E_{1,2}$  hold that

$$\begin{aligned} & \text{Cov} \left[ \gamma_1(X) \hat{\mathbf{e}}_{1,k(l)}^s(X) \hat{\mathbf{e}}_{2,k(l)}^q(X), \gamma_2(Y) \hat{\mathbf{e}}_{1,k(l')}^t(Y) \hat{\mathbf{e}}_{2,k(l')}^r(Y) \right] \\ &= \mathbb{E} \left[ \gamma_1(X) \hat{\mathbf{e}}_{1,k(l)}^s(X) \hat{\mathbf{e}}_{2,k(l)}^q(X) \gamma_2(Y) \hat{\mathbf{e}}_{1,k(l')}^t(Y) \hat{\mathbf{e}}_{2,k(l')}^r(Y) \right] \\ & \quad - \mathbb{E} \left[ \gamma_1(X) \hat{\mathbf{e}}_{1,k(l)}^s(X) \hat{\mathbf{e}}_{2,k(l)}^q(X) \right] \mathbb{E} \left[ \gamma_2(Y) \hat{\mathbf{e}}_{1,k(l')}^t(Y) \hat{\mathbf{e}}_{2,k(l')}^r(Y) \right] \\ &= \gamma_1(X) \gamma_2(Y) \mathbb{E} \left[ \hat{\mathbf{e}}_{1,k(l)}^s(X) \hat{\mathbf{e}}_{1,k(l')}^t(Y) \right] \mathbb{E} \left[ \hat{\mathbf{e}}_{2,k(l)}^q(X) \hat{\mathbf{e}}_{2,k(l')}^r(Y) \right] \\ & \quad + 1_{\{q,r,s,t \neq 1\}} O \left( \frac{1}{k(l)^{\frac{q+s}{2}} k(l')^{\frac{r+t}{2}}} \right). \end{aligned} \quad (20)$$

Now  $\mathbb{E} \left[ \hat{\mathbf{e}}_{i,k(l)}^s(X) \hat{\mathbf{e}}_{i,k(l')}^t(Y) \right] = \text{Cov} \left[ \hat{\mathbf{e}}_{i,k(l)}^s(X), \hat{\mathbf{e}}_{i,k(l')}^t(Y) \right] + \mathbb{E} \left[ \hat{\mathbf{e}}_{i,k(l)}^s(X) \right] \mathbb{E} \left[ \hat{\mathbf{e}}_{i,k(l')}^t(Y) \right]$ . By Eqs. 11, 17, and 18 this gives (when  $s, t \geq 1$ )

$$\begin{aligned} \mathbb{E} \left[ \hat{\mathbf{e}}_{i,k(l)}^s(X) \hat{\mathbf{e}}_{i,k(l')}^t(Y) \right] &= 1_{\{s,t \geq 2\}} O \left( \frac{1}{k(l)^{\frac{s}{2}} k(l')^{\frac{t}{2}}} \right) \\ & \quad + \begin{cases} 1_{\{s=t=1\}} \left( \frac{-f_i(X)f_i(Y)}{M} \right) + o \left( \frac{1}{M} \right), & \{X, Y\} \in \Psi(l, l') \\ O \left( \frac{1}{k(l)^{\frac{s}{2}} k(l')^{\frac{t}{2}}} \right), & \{X, Y\} \in \Psi(l, l')^C. \end{cases} \end{aligned} \quad (21)$$

Now

$$\mathbb{E} \left[ Cov_{\mathbf{X}, \mathbf{Y}} \left[ \gamma_1(\mathbf{X}) \hat{\mathbf{e}}_{1,k(l)}^s(\mathbf{X}) \hat{\mathbf{e}}_{2,k(l)}^q(\mathbf{X}), \gamma_2(\mathbf{Y}) \hat{\mathbf{e}}_{1,k(l')}^t(\mathbf{Y}) \hat{\mathbf{e}}_{2,k(l')}^r(\mathbf{Y}) \right] \right] = I_1 + I_2,$$

where

$$I_1 = \mathbb{E} \left[ 1_{\{\mathbf{X}, \mathbf{Y}\} \in \Psi(l, l')^C} \gamma_1(\mathbf{X}) \gamma_2(\mathbf{Y}) Cov_{\mathbf{X}, \mathbf{Y}} \left[ \hat{\mathbf{e}}_{1,k(l)}^s(\mathbf{X}) \hat{\mathbf{e}}_{2,k(l)}^q(\mathbf{X}), \hat{\mathbf{e}}_{1,k(l')}^t(\mathbf{Y}) \hat{\mathbf{e}}_{2,k(l')}^r(\mathbf{Y}) \right] \right],$$

$$I_2 = \mathbb{E} \left[ 1_{\{\mathbf{X}, \mathbf{Y}\} \in \Psi(l, l')} \gamma_1(\mathbf{X}) \gamma_2(\mathbf{Y}) Cov_{\mathbf{X}, \mathbf{Y}} \left[ \hat{\mathbf{e}}_{1,k(l)}^s(\mathbf{X}) \hat{\mathbf{e}}_{2,k(l)}^q(\mathbf{X}), \hat{\mathbf{e}}_{1,k(l')}^t(\mathbf{Y}) \hat{\mathbf{e}}_{2,k(l')}^r(\mathbf{Y}) \right] \right].$$

Combining Eqs. 20 and 21 gives

$$\begin{aligned} I_1 &= \mathbb{E} \left[ 1_{\{\mathbf{X}, \mathbf{Y}\} \in \Psi(l, l')^C} \gamma_1(\mathbf{X}) \gamma_2(\mathbf{Y}) O \left( \frac{1}{k(l)^{\frac{s+q}{2}} k(l')^{\frac{r+t}{2}}} \right) \right] \\ &= \int \left( O \left( \frac{1}{k(l)^{\frac{s+q}{2}} k(l')^{\frac{r+t}{2}}} \right) (\gamma_1(x) \gamma_2(x) + o(1)) \right) \left( \int_{\{x, y\} \in \Psi(l, l')^C} dy \right) dx \\ &= \int \left( O \left( \frac{1}{k(l)^{\frac{s+q}{2}} k(l')^{\frac{r+t}{2}}} \right) (\gamma_1(x) \gamma_2(x) + o(1)) \right) \left( 2^d \frac{\max(k(l), k(l'))}{M} \right) dx \\ &= o \left( \frac{1}{M} \right). \end{aligned}$$

Similarly,

$$I_2 = \mathbb{E} \left[ 1_{\{\mathbf{X}, \mathbf{Y}\} \in \Psi(l, l')} \gamma_1(\mathbf{X}) \gamma_2(\mathbf{Y}) o \left( \frac{1}{M} \right) \right] = o \left( \frac{1}{M} \right),$$

and so

$$Cov \left[ \gamma_1(\mathbf{X}) \hat{\mathbf{e}}_{1,k(l)}^s(\mathbf{X}) \hat{\mathbf{e}}_{2,k(l)}^q(\mathbf{X}), \gamma_2(\mathbf{Y}) \hat{\mathbf{e}}_{1,k(l')}^t(\mathbf{Y}) \hat{\mathbf{e}}_{2,k(l')}^r(\mathbf{Y}) \right] = o \left( \frac{1}{M} \right). \quad (22)$$

Assume now that neither  $E_0$ ,  $E_{1,1}$ , nor  $E_{1,2}$ . If either  $q, r = 0$  or  $s, t = 0$  and the remaining exponents are nonzero, then the left hand side of Eq. 22 reduces to Eq. 19. For the other cases, suppose that  $s, q = 0$  and  $t, r \geq 2$  as an example. Then we have that

$$\begin{aligned} Cov \left[ \gamma_1(\mathbf{X}), \gamma_2(\mathbf{Y}) \hat{\mathbf{e}}_{1,k(l')}^t(\mathbf{Y}) \hat{\mathbf{e}}_{2,k(l')}^r(\mathbf{Y}) \right] &= \mathbb{E} \left[ \gamma_1(\mathbf{X}) \gamma_2(\mathbf{Y}) \hat{\mathbf{e}}_{1,k_1}^t(\mathbf{Y}) \hat{\mathbf{e}}_{2,k_2}^r(\mathbf{Y}) \right] \\ &\quad - \mathbb{E} \left[ \gamma_1(\mathbf{X}) \right] \mathbb{E} \left[ \gamma_2(\mathbf{Y}) \hat{\mathbf{e}}_{1,k_1}^t(\mathbf{Y}) \hat{\mathbf{e}}_{2,k_2}^r(\mathbf{Y}) \right] \\ &= \mathbb{E} \left[ \gamma_1(\mathbf{X}) \right] \mathbb{E} \left[ \gamma_2(\mathbf{Y}) \hat{\mathbf{e}}_{1,k_1}^t(\mathbf{Y}) \hat{\mathbf{e}}_{2,k_2}^r(\mathbf{Y}) \right] \\ &\quad - \mathbb{E} \left[ \gamma_1(\mathbf{X}) \right] \mathbb{E} \left[ \gamma_2(\mathbf{Y}) \hat{\mathbf{e}}_{1,k_1}^t(\mathbf{Y}) \hat{\mathbf{e}}_{2,k_2}^r(\mathbf{Y}) \right] \\ &= 0. \end{aligned}$$

The same result follows for all other cases.

Finally, applying Eqs. 19 and 22 to Eq. 10 gives

$$\begin{aligned} Cov \left[ \gamma_1(\mathbf{X}) \hat{\mathbf{F}}_{k(l)}^q(\mathbf{X}), \gamma_2(\mathbf{Y}) \hat{\mathbf{F}}_{k(l')}^r(\mathbf{Y}) \right] &= o \left( \frac{1}{M} \right) + 1_{\{q=1, r=1\}} \left( \frac{1}{M} \right) \times \\ &\quad \left( c_{7,1} \left( \frac{\gamma_1(x)}{\mathbb{E}_X \hat{\mathbf{f}}_{2,k(l)}(x)}, \frac{\gamma_2(x)}{\mathbb{E}_X \hat{\mathbf{f}}_{2,k(l')}^r(x)} \right) + c_{7,2} \left( \frac{-\gamma_1(x) \mathbb{E}_X \hat{\mathbf{f}}_{1,k(l)}(x)}{\mathbb{E}_X \hat{\mathbf{f}}_{2,k(l)}(x)}, \frac{-\gamma_2(x) \mathbb{E}_X \hat{\mathbf{f}}_{1,k(l')}^r(x)}{\mathbb{E}_X \hat{\mathbf{f}}_{2,k(l')}^r(x)} \right) \right) \\ &= 1_{\{q=1, r=1\}} c_8 (\gamma_1(x), \gamma_2(x)) \left( \frac{1}{M} \right) + o \left( \frac{1}{M} \right). \end{aligned}$$

Note that this holds even if  $l = l'$ . □

The following lemma is required to bound the  $\Psi(\mathbf{Z})$  term.

**Lemma 4.** Assume that  $U(x)$  is any arbitrary functional which satisfies

$$\begin{aligned}
(i) \quad & \mathbb{E} \left[ \sup_{L \in (p_l, p_u)} \left| U \left( L \frac{\mathbf{p}_2}{\mathbf{p}_1} \right) \right| \right] = G_1 < \infty, \\
(ii) \quad & \sup_{L \in \left( \frac{q_{l,1}}{q_{u,2}}, \frac{q_{u,1}}{q_{l,2}} \right)} |U(L)| \mathcal{C}(k_1) \mathcal{C}(k_2) = G_2 < \infty, \\
(iii) \quad & \mathbb{E} \left[ \sup_{L \in \left( \frac{q_{l,1}}{p_{u,2}}, \frac{q_{u,1}}{p_{l,2}} \right)} |U(L \mathbf{p}_2)| \mathcal{C}(k_1) \right] = G_3 < \infty, \\
(iv) \quad & \mathbb{E} \left[ \sup_{L \in \left( \frac{p_{l,1}}{q_{u,2}}, \frac{p_{u,1}}{q_{l,2}} \right)} \left| U \left( \frac{L}{\mathbf{p}_1} \right) \right| \mathcal{C}(k_2) \right] = G_4 < \infty.
\end{aligned}$$

Let  $\mathbf{Z}$  be  $\mathbf{X}_i$  for some fixed  $i \in \{1, \dots, N\}$  and  $\xi_{\mathbf{Z}}$  be any random variable which almost surely lies in  $(L(\mathbf{Z}), \hat{\mathbf{L}}_{k_1, k_2}(\mathbf{Z}))$ . Then  $\mathbb{E}|U(\xi_{\mathbf{Z}})| < \infty$ .

*Proof.* This is a version of Lemma 9 in [4] modified to apply to functionals of the likelihood ratio. Because of assumption  $\mathcal{A}.1$ , it is sufficient to show that the conditional expectation  $\mathbb{E}[|U(\xi_{\mathbf{Z}})| | \mathbf{X}_1, \dots, \mathbf{X}_N] < \infty$ .

First, some properties of  $k$ -NN density estimators are required. Let  $\mathbf{S}_{k_i, i}(Z) = \left\{ Y : d(Z, Y) \leq \mathbf{d}_{Z, i}^{(k_i)} \right\}$  where  $\mathbf{d}_{Z, i}^{(k_i)}$  is the distance to the  $k_i$ th nearest neighbor of  $Z$  from the corresponding set of samples. Then let  $\mathbf{P}_i(Z) = \int_{\mathbf{S}_{k_i, i}(Z)} f_i(x) dx$  which has a beta distribution with parameters  $k_i$  and  $M_i - k_i + 1$  [6]. Let  $A_i(Z)$  be the event that  $\mathbf{P}_i(Z) < \left( \frac{\sqrt{6}}{k_i^{5/2}} + 1 \right) \frac{k_i - 1}{M_i}$ . It has been shown that  $Pr(A_i(Z)^C) = \Theta(\mathcal{C}(k_i))$  and that under  $A_i(Z)$  [3, 5],

$$\frac{p_{l, i}}{\mathbf{P}_i(Z)} < \hat{\mathbf{f}}_{i, k_i}(Z) < \frac{p_{u, i}}{\mathbf{P}_i(Z)}.$$

It has also been shown that under  $A_i(Z)^C$  [3, 5],

$$q_{l, i} < \hat{\mathbf{f}}_{i, k_i}(Z) < q_{u, i}.$$

Let  $A(Z) = A_1(Z) \cap A_2(Z)$  and note that  $A_1(Z)$  and  $A_2(Z)$  are independent events. Thus since  $\hat{\mathbf{L}}_{k_1, k_2}(Z) = \frac{\hat{\mathbf{f}}_{1, k_1}(Z)}{\hat{\mathbf{f}}_{2, k_2}(Z)}$ , we have that under  $A(Z)$ ,

$$p_l \frac{\mathbf{P}_2(Z)}{\mathbf{P}_1(Z)} < \hat{\mathbf{L}}_{k_1, k_2}(Z) < p_u \frac{\mathbf{P}_2(Z)}{\mathbf{P}_1(Z)}.$$

Now let  $Q_1(Z) = A_1(Z)^C \cap A_2(Z)^C$ ,  $Q_2(Z) = A_1(Z)^C \cap A_2(Z)$ , and  $Q_3(Z) = A_1(Z) \cap A_2(Z)^C$ . Then due to independence and the fact that the  $Q_i(Z)$ s are disjoint,

$$\begin{aligned}
A(Z)^C &= A_1(Z)^C \cup A_2(Z)^C = Q_1(Z) \cup Q_2(Z) \cup Q_3(Z), \\
\implies Pr(A(Z)^C) &= Pr(Q_1(Z)) + Pr(Q_2(Z)) + Pr(Q_3(Z)) \\
&\leq \mathcal{C}(k_1) \mathcal{C}(k_2) + \mathcal{C}(k_1) + \mathcal{C}(k_2).
\end{aligned}$$

Then under  $Q_1(Z)$ ,  $Q_2(Z)$ , and  $Q_3(Z)$ , respectively,

$$\begin{aligned}
\frac{q_{l, 1}}{q_{u, 2}} &< \hat{\mathbf{L}}_{k_1, k_2}(Z) < \frac{q_{u, 1}}{q_{l, 2}}, \\
\frac{q_{l, 1} \mathbf{P}_2(Z)}{p_{u, 2}} &< \hat{\mathbf{L}}_{k_1, k_2}(Z) < \frac{q_{u, 1} \mathbf{P}_2(Z)}{p_{l, 2}}, \\
\frac{p_{l, 1}}{\mathbf{P}_1(Z) q_{u, 2}} &< \hat{\mathbf{L}}_{k_1, k_2}(Z) < \frac{p_{u, 1}}{\mathbf{P}_1(Z) q_{l, 2}}.
\end{aligned}$$



Conditioning on  $\mathbf{X}_1, \dots, \mathbf{X}_N$  gives

$$\begin{aligned}
\mathbb{E}[|U(\xi_Z)|] &= \mathbb{E}[1_{A(Z)} |U(\xi_Z)|] + \mathbb{E}[1_{Q_1(Z)} |U(\xi_Z)|] + \mathbb{E}[1_{Q_2(Z)} |U(\xi_Z)|] + \mathbb{E}[1_{Q_3(Z)} |U(\xi_Z)|] \\
&\leq Pr(A(Z)) \mathbb{E} \left[ \sup_{L \in (p_l, p_u)} \left| U \left( L \frac{\mathbf{P}_2(Z)}{\mathbf{P}_1(Z)} \right) \right| \right] + Pr(Q_1(Z)) \sup_{L \in \left( \frac{q_{l,1}}{q_{u,2}}, \frac{q_{u,1}}{q_{l,2}} \right)} |U(L)| \\
&\quad + Pr(Q_1(Z)) \mathbb{E} \left[ \sup_{L \in \left( \frac{q_{l,1}}{p_{u,2}}, \frac{q_{u,1}}{p_{l,2}} \right)} |U(LP_2(Z))| \right] \\
&\quad + Pr(Q_1(Z)) \mathbb{E} \left[ \sup_{L \in \left( \frac{p_{l,1}}{q_{u,2}}, \frac{p_{u,1}}{q_{l,2}} \right)} \left| U \left( \frac{L}{\mathbf{P}_1(Z)} \right) \right| \right] \\
&\leq \mathbb{E} \left[ \sup_{L \in (p_l, p_u)} \left| U \left( L \frac{\mathbf{P}_2(Z)}{\mathbf{P}_1(Z)} \right) \right| \right] + \sup_{L \in \left( \frac{q_{l,1}}{q_{u,2}}, \frac{q_{u,1}}{q_{l,2}} \right)} |U(L)| \mathcal{C}(k_1) \mathcal{C}(k_2) \\
&\quad + \mathbb{E} \left[ \sup_{L \in \left( \frac{q_{l,1}}{p_{u,2}}, \frac{q_{u,1}}{p_{l,2}} \right)} |U(LP_2(Z))| \mathcal{C}(k_1) \right] \\
&\quad + \mathbb{E} \left[ \sup_{L \in \left( \frac{p_{l,1}}{q_{u,2}}, \frac{p_{u,1}}{q_{l,2}} \right)} \left| U \left( \frac{L}{\mathbf{P}_1(Z)} \right) \right| \mathcal{C}(k_2) \right] \\
&= G_1 + G_2 + G_3 + G_4 < \infty.
\end{aligned}$$

□

The next lemma gives the last result necessary to bound the covariance of  $\mathbf{Y}_{M,1}$  and  $\mathbf{Y}_{M,2}$ .

**Lemma 5.** Let  $l, l' \in \bar{l}$  be fixed,  $M_1 = M_2 = M$ ,  $k(l) = l\sqrt{M}$ , and  $\hat{\mathbf{L}}_{k(l)} = \hat{\mathbf{L}}_{k(l), k(l)}$ . Let  $\mathbf{X}_i$  and  $\mathbf{X}_j$  be realizations of the density  $f_2$  independent of  $\hat{\mathbf{f}}_{1, k_1}$  and  $\hat{\mathbf{f}}_{2, k_2}$  and independent of each other when  $i \neq j$ . Then

$$\begin{aligned}
&\text{Cov} \left[ g \left( \hat{\mathbf{L}}_{k(l)}(\mathbf{X}_i) \right), g \left( \hat{\mathbf{L}}_{k(l')}(\mathbf{X}_j) \right) \right] \\
&= \begin{cases} \mathbb{E} \left[ \mathbf{p}_i^{(l)} \mathbf{p}_i^{(l')} \right] + o(1), & i = j \\ c_8 \left( g' \left( \mathbb{E}_X \hat{\mathbf{L}}_{k(l)}(x) \right), g' \left( \mathbb{E}_X \hat{\mathbf{L}}_{k(l')}(x) \right) \right) \left( \frac{1}{M} \right) + o \left( \frac{1}{M} \right), & i \neq j. \end{cases} \quad (23)
\end{aligned}$$

*Proof.* Consider the case where  $i = j$ . Then applying Lemma 3 to Eq. 4 gives

$$\text{Cov} \left[ g \left( \hat{\mathbf{L}}_{k(l)}(\mathbf{X}_i) \right), g \left( \hat{\mathbf{L}}_{k(l')}(\mathbf{X}_j) \right) \right] = \mathbb{E} \left[ \mathbf{p}_i^{(l)} \mathbf{p}_i^{(l')} \right] + o(1).$$

Note that  $\mathbb{E} \left[ \mathbf{p}_i^{(l)} \mathbf{p}_i^{(l')} \right] = O(1)$  since  $\mathbf{p}_i^{(l)} = \mathcal{M} \left( g \left( \mathbb{E}_{\mathbf{X}_i} \hat{\mathbf{L}}_{k(l)}(\mathbf{X}_i) \right) \right) = \mathcal{M} \left( g(L(\mathbf{X}_i)) \right) + o(1)$ .

Now let  $i \neq j$ . Since  $\mathbf{X}_i$  and  $\mathbf{X}_j$  are independent,  $\mathbb{E} \left[ \mathbf{p}_i^{(l)} \left( \mathbf{p}_j^{(l')} + \mathbf{q}_j^{(l')} + \mathbf{r}_j^{(l')} + \mathbf{s}_j^{(l')} \right) \right] = 0$ .

Applying Lemma 3 gives

$$\begin{aligned}
\mathbb{E} \left[ \mathbf{q}_i^{(l)} \mathbf{q}_j^{(l')} \right] &= c_8 \left( g' \left( \mathbb{E}_X \hat{\mathbf{L}}_{k(l)}(x) \right), g' \left( \mathbb{E}_X \hat{\mathbf{L}}_{k(l')}(x) \right) \right) \left( \frac{1}{M} \right) + o \left( \frac{1}{M} \right), \\
\mathbb{E} \left[ \mathbf{q}_i^{(l)} \mathbf{r}_j^{(l')} \right] &= o \left( \frac{1}{M} \right), \\
\mathbb{E} \left[ \mathbf{r}_i^{(l)} \mathbf{r}_j^{(l')} \right] &= o \left( \frac{1}{M} \right).
\end{aligned}$$

We use Cauchy-Schwarz and Lemma 2 to get

$$\begin{aligned}
& \mathbb{E} \left[ g' \left( \mathbb{E}_{\mathbf{X}_i} \hat{\mathbf{L}}_{k(l)}(\mathbf{X}_i) \right) \hat{\mathbf{F}}_{k(l)}(\mathbf{X}_i) \Psi(\mathbf{X}_j) \hat{\mathbf{F}}_{k(l')}^\lambda(\mathbf{X}_j) \right] \\
& \leq \sqrt{\mathbb{E}[\Psi^2(\mathbf{X}_j)]} \mathbb{E} \left[ \left( g' \left( \mathbb{E}_{\mathbf{X}_i} \hat{\mathbf{L}}_{k(l)}(\mathbf{X}_i) \right) \hat{\mathbf{F}}_{k(l)}(\mathbf{X}_i) \right)^2 \hat{\mathbf{F}}_{k(l')}^{2\lambda}(\mathbf{X}_j) \right] \\
& \leq \sqrt{\mathbb{E}[\Psi^2(\mathbf{X}_j)]} \sqrt{\mathbb{E} \left[ \left( g' \left( \mathbb{E}_{\mathbf{X}_i} \hat{\mathbf{L}}_{k(l)}(\mathbf{X}_i) \right) \hat{\mathbf{F}}_{k(l)}(\mathbf{X}_i) \right)^4 \right]} \mathbb{E} \left[ \hat{\mathbf{F}}_{k(l')}^{4\lambda}(\mathbf{X}_j) \right] \\
& = \sqrt{\mathbb{E}[\Psi^2(\mathbf{X}_j)]} \sqrt{O\left(\frac{1}{k(l)^2}\right) O\left(\frac{1}{k(l')^{2\lambda}}\right)} \\
& = \sqrt{\mathbb{E}[\Psi^2(\mathbf{X}_j)]} o\left(\frac{1}{k(l')^{\lambda/2}}\right).
\end{aligned}$$

Lemma 4 and assumption (A.5) implies that  $\mathbb{E}[\Psi^2(\mathbf{X}_j)] = O(1)$  and from assumption (A.3),  $o\left(\frac{1}{k(l')^{\lambda/2}}\right) = o\left(\frac{1}{M}\right)$ . This implies that  $\mathbb{E}[\mathbf{q}_i^{(l)} \mathbf{s}_j^{(l')}] = o\left(\frac{1}{M}\right)$ . Similarly,  $\mathbb{E}[\mathbf{r}_i^{(l)} \mathbf{s}_j^{(l')}] = o\left(\frac{1}{M}\right)$  and  $\mathbb{E}[\mathbf{s}_i^{(l)} \mathbf{s}_j^{(l')}] = o\left(\frac{1}{M}\right)$ . Combining these results with Eq. 4 completes the proof.  $\square$

Applying Lemma 5 to Eqs. 2 and 3 shows that  $\text{Cov}(\mathbf{Y}_{M,i}, \mathbf{Y}_{M,j}) = O\left(\frac{1}{M}\right)$ .

For the covariance of  $\mathbf{Y}_{M,i}^2$  and  $\mathbf{Y}_{M,j}^2$ , we only need to consider the numerator since we previously showed that  $\mathbb{V} \left[ \sum_{l \in \bar{l}} w(l) g \left( \hat{\mathbf{L}}_{k(l)}(\mathbf{X}_i) \right) \right] = O(1) + o(1)$ . Assume WLOG that  $i = 1$  and  $j = 2$  and let  $h_l = \mathbb{E} \left[ g \left( \hat{\mathbf{L}}_{k(l)}(\mathbf{X}_i) \right) \right]$ . The numerator of the covariance is then

$$\begin{aligned}
& \sum_{l \in \bar{l}} \sum_{l' \in \bar{l}} \sum_{j \in \bar{l}} \sum_{j' \in \bar{l}} \text{Cov} \left[ \left( g \left( \hat{\mathbf{L}}_{k(l)}(\mathbf{X}_1) \right) - h_l \right) \left( g \left( \hat{\mathbf{L}}_{k(l')}(\mathbf{X}_1) \right) - h_{l'} \right), \right. \\
& \quad \left. \left( g \left( \hat{\mathbf{L}}_{k(j)}(\mathbf{X}_2) \right) - h_j \right) \left( g \left( \hat{\mathbf{L}}_{k(j')}(\mathbf{X}_2) \right) - h_{j'} \right) \right] \\
& = \sum_{l \in \bar{l}} \sum_{l' \in \bar{l}} \sum_{j \in \bar{l}} \sum_{j' \in \bar{l}} \text{Cov} \left[ \left( \mathbf{p}_1^{(l)} + \mathbf{q}_1^{(l)} + \mathbf{r}_1^{(l)} + \mathbf{s}_1^{(l)} \right) \left( \mathbf{p}_1^{(l')} + \mathbf{q}_1^{(l')} + \mathbf{r}_1^{(l')} + \mathbf{s}_1^{(l')} \right), \right. \\
& \quad \left. \left( \mathbf{p}_2^{(j)} + \mathbf{q}_2^{(j)} + \mathbf{r}_2^{(j)} + \mathbf{s}_2^{(j)} \right) \left( \mathbf{p}_2^{(j')} + \mathbf{q}_2^{(j')} + \mathbf{r}_2^{(j')} + \mathbf{s}_2^{(j')} \right) \right].
\end{aligned}$$

Let  $d_l(x) = (g(x) - h_l)^2$ . Then for the case where  $l = l'$  and  $j = j'$ , we have

$$\text{Cov} \left[ d_l \left( \hat{\mathbf{L}}_{k(l)}(\mathbf{X}_1) \right), d_j \left( \hat{\mathbf{L}}_{k(j)}(\mathbf{X}_2) \right) \right] = O\left(\frac{1}{M}\right).$$

This follows from Lemma 5.

For the general case, note that due to the independence of  $\mathbf{X}_1$  and  $\mathbf{X}_2$ ,

$$\begin{aligned}
& \text{Cov} \left[ \mathbf{p}_1^{(l)} \mathbf{p}_1^{(l')}, \left( g \left( \hat{\mathbf{L}}_{k(j)}(\mathbf{X}_2) \right) - h_j \right) \left( g \left( \hat{\mathbf{L}}_{k(j')}(\mathbf{X}_2) \right) - h_{j'} \right) \right] = 0, \\
& \text{Cov} \left[ \left( g \left( \hat{\mathbf{L}}_{k(l)}(\mathbf{X}_1) \right) - h_l \right) \left( g \left( \hat{\mathbf{L}}_{k(l')}(\mathbf{X}_1) \right) - h_{l'} \right), \mathbf{p}_2^{(j)} \mathbf{p}_2^{(j')} \right] = 0.
\end{aligned}$$

To bound the remaining terms, we require the following Lemma:

**Lemma 6.** Let  $\gamma_1(x)$ ,  $\gamma_2(x)$  be arbitrary functions with 1 partial derivative wrt  $x$  and  $\sup_x |\gamma_i(x)| < \infty$ ,  $i = 1, 2$ . Let  $l, l', j, j' \in \bar{l}$  be fixed,  $M_1 = M_2 = M$ ,  $k(l) = l\sqrt{M}$ . Let  $\mathbf{X}$  and  $\mathbf{Y}$  be realizations of the density  $f_2$  independent of  $\hat{\mathbf{f}}_{i,k(l)}$ ,  $\hat{\mathbf{f}}_{i,k(l')}$ ,  $\hat{\mathbf{f}}_{i,k(j)}$ , and  $\hat{\mathbf{f}}_{i,k(j')}$ ,  $i = 1, 2$ . If  $q, r, s, t \geq 0$  and the cases  $\{t = 0, r = 0\}$  or  $\{q = 0, s = 0\}$  do not hold, then

$$\text{Cov} \left[ \gamma_1(\mathbf{X}) \hat{\mathbf{F}}_{k(l)}^s(\mathbf{X}) \hat{\mathbf{F}}_{k(l')}^q(\mathbf{X}), \gamma_2(\mathbf{Y}) \hat{\mathbf{F}}_{k(j)}^t(\mathbf{Y}) \hat{\mathbf{F}}_{k(j')}^r(\mathbf{Y}) \right] = O\left(\frac{1}{M}\right).$$

*Proof.* Under certain conditions, by Cauchy-Schwarz and Eq. 13 we have

$$\begin{aligned}
& Cov \left[ \gamma_1(\mathbf{X}) \hat{\mathbf{e}}_{1,k(l)}^s(\mathbf{X}) \hat{\mathbf{e}}_{2,k(l)}^q(\mathbf{X}) \hat{\mathbf{e}}_{1,k(l')}^{s'}(\mathbf{X}) \hat{\mathbf{e}}_{2,k(l')}^{q'}(\mathbf{X}), \right. \\
& \quad \left. \gamma_2(\mathbf{Y}) \hat{\mathbf{e}}_{1,k(j)}^t(\mathbf{Y}) \hat{\mathbf{e}}_{2,k(j)}^r(\mathbf{Y}) \hat{\mathbf{e}}_{1,k(j')}^{t'}(\mathbf{Y}) \hat{\mathbf{e}}_{2,k(j')}^{r'}(\mathbf{Y}) \right] \\
& \leq \mathbb{E} \left[ \gamma_1(\mathbf{X}) \gamma_2(\mathbf{Y}) \sqrt{\mathbb{V}_{\mathbf{X}} \left[ \hat{\mathbf{e}}_{1,k(l)}^s(\mathbf{X}) \hat{\mathbf{e}}_{2,k(l)}^q(\mathbf{X}) \hat{\mathbf{e}}_{1,k(l')}^{s'}(\mathbf{X}) \hat{\mathbf{e}}_{2,k(l')}^{q'}(\mathbf{X}) \right]} \right. \\
& \quad \left. \times \sqrt{\mathbb{V}_{\mathbf{Y}} \left[ \hat{\mathbf{e}}_{1,k(j)}^t(\mathbf{Y}) \hat{\mathbf{e}}_{2,k(j)}^r(\mathbf{Y}) \hat{\mathbf{e}}_{1,k(j')}^{t'}(\mathbf{Y}) \hat{\mathbf{e}}_{2,k(j')}^{r'}(\mathbf{Y}) \right]} \right] \\
& = O \left( \frac{1}{k(l)^{\frac{s+q}{2}} k(l')^{\frac{s'+q'}{2}} k(j)^{\frac{t+r}{2}} k(j')^{\frac{t'+r'}{2}}} \right) = O \left( \frac{1}{M^{\frac{s+q+s'+q'+t+r+t'+r'}{4}}} \right). \quad (24)
\end{aligned}$$

Note that the exponents  $q, s, r, t$  are not the same as in the statement of the lemma. The conditions under which this expression holds are as follows: (1) There must be at least one positive exponent on both sides of the arguments in the covariance. (2)  $\{s + s' + t + t' \neq 1\} \cap \{q + q' + r + r' \neq 1\}$ . If neither case holds, this reduces to Eq. 19. If only one holds, then the covariance is zero.

Note that if  $s + q + s' + q' + t + r + t' + r' \geq 4$ , Eq. 24 becomes  $O\left(\frac{1}{M}\right)$ . Now consider the case where  $\{\{s + s' + t + t' = 3\} \cap \{s, s', t, t' \leq 1\} \cap \{q, q', r, r' = 0\}\} \cup \{\{q + q' + r + r' = 3\} \cap \{q, q', r, r' \leq 1\} \cap \{s, s', t, t' = 0\}\}$ . Assume WLOG that  $s, s', t = 1$ . Then Eq. 24 becomes  $O\left(\frac{1}{M^{\frac{3}{4}}}\right)$  which does not decay fast enough to use Lemma 1. However, we can use the fact that  $k(l) = O(k(l'))$  to obtain a bound of  $O\left(\frac{1}{M}\right)$ . By Markov's inequality and Eqs. 11 and 12, for fixed  $\nu > 0$ ,

$$\begin{aligned}
Pr(|\hat{\mathbf{e}}_{1,k(l)}(\mathbf{X}) - \hat{\mathbf{e}}_{1,k(l')}(\mathbf{X})| > \nu) & \leq \frac{\mathbb{E}[(\hat{\mathbf{e}}_{1,k(l)}(\mathbf{X}) - \hat{\mathbf{e}}_{1,k(l')}(\mathbf{X}))^4]}{\nu^4} \\
& = O\left(\frac{1}{M}\right).
\end{aligned}$$

Let  $H$  be the event that  $|\hat{\mathbf{e}}_{1,k(l)}(\mathbf{X}) - \hat{\mathbf{e}}_{1,k(l')}(\mathbf{X})| \leq 1$ . This gives

$$\begin{aligned}
& Cov[\gamma_1(\mathbf{X}) \hat{\mathbf{e}}_{1,k(l)}(\mathbf{X}) \hat{\mathbf{e}}_{1,k(l')}(\mathbf{X}), \gamma_2(\mathbf{Y}) \hat{\mathbf{e}}_{1,k(j)}(\mathbf{Y})] \\
& = \mathbb{E}[\gamma_1(\mathbf{X}) \gamma_2(\mathbf{Y}) \hat{\mathbf{e}}_{1,k(l)}(\mathbf{X}) \hat{\mathbf{e}}_{1,k(l')}(\mathbf{X}) \hat{\mathbf{e}}_{1,k(j)}(\mathbf{Y})] \\
& = \mathbb{E}[\mathbf{1}_H \gamma_1(\mathbf{X}) \gamma_2(\mathbf{Y}) \hat{\mathbf{e}}_{1,k(l)}(\mathbf{X}) \hat{\mathbf{e}}_{1,k(l')}(\mathbf{X}) \hat{\mathbf{e}}_{1,k(j)}(\mathbf{Y})] \\
& \quad + \mathbb{E}[\mathbf{1}_{H^C} \gamma_1(\mathbf{X}) \gamma_2(\mathbf{Y}) \hat{\mathbf{e}}_{1,k(l)}(\mathbf{X}) \hat{\mathbf{e}}_{1,k(l')}(\mathbf{X}) \hat{\mathbf{e}}_{1,k(j)}(\mathbf{Y})] \\
& \leq \mathbb{E}[\mathbf{1}_H \gamma_1(\mathbf{X}) \gamma_2(\mathbf{Y}) \hat{\mathbf{e}}_{1,k(l)}^2(\mathbf{X}) \hat{\mathbf{e}}_{1,k(j)}(\mathbf{Y})] + \mathbb{E}[\mathbf{1}_H \gamma_1(\mathbf{X}) \gamma_2(\mathbf{Y}) \hat{\mathbf{e}}_{1,k(l)}(\mathbf{X}) \hat{\mathbf{e}}_{1,k(j)}(\mathbf{Y})] \\
& \quad + \mathbb{E}[\mathbf{1}_{H^C} \gamma_1(\mathbf{X}) \gamma_2(\mathbf{Y}) \hat{\mathbf{e}}_{1,k(l)}(\mathbf{X}) \hat{\mathbf{e}}_{1,k(l')}(\mathbf{X}) \hat{\mathbf{e}}_{1,k(j)}(\mathbf{Y})] \\
& = O\left(\frac{1}{M}\right). \quad (25)
\end{aligned}$$

The final step for the first two terms comes from Eq. 19. The final step for the third term comes from the fact that  $Pr(H^C) = O\left(\frac{1}{M}\right)$  and the fact that  $\mathbb{E}[\gamma_1(\mathbf{X}) \gamma_2(\mathbf{Y}) \hat{\mathbf{e}}_{1,k(l)}(\mathbf{X}) \hat{\mathbf{e}}_{1,k(l')}(\mathbf{X}) \hat{\mathbf{e}}_{1,k(j)}(\mathbf{Y})] = o(1)$  by Eq. 24. Applying Eqs. 19, 22, 24, and 25 to Eq. 10 completes the proof.  $\square$

From Lemma 6, it is clear that

$$\begin{aligned}
& Cov \left[ \left( \mathbf{p}_1^{(l)} + \mathbf{q}_1^{(l)} + \mathbf{r}_1^{(l)} + \mathbf{s}_1^{(l)} \right) \left( \mathbf{p}_1^{(l')} + \mathbf{q}_1^{(l')} + \mathbf{r}_1^{(l')} + \mathbf{s}_1^{(l')} \right), \right. \\
& \quad \left. \left( \mathbf{p}_2^{(j)} + \mathbf{q}_2^{(j)} + \mathbf{r}_2^{(j)} + \mathbf{s}_2^{(j)} \right) \left( \mathbf{p}_2^{(j')} + \mathbf{q}_2^{(j')} + \mathbf{r}_2^{(j')} + \mathbf{s}_2^{(j')} \right) \right] = O\left(\frac{1}{M}\right) \\
& \implies Cov[\mathbf{Y}_{M,i}^2, \mathbf{Y}_{M,j}^2] = O\left(\frac{1}{M}\right).
\end{aligned}$$

Then by Lemma 1,  $\mathbf{S}_{N,M} = \frac{\hat{\mathbf{G}}_w - \mathbb{E}[\hat{\mathbf{G}}_w]}{\sqrt{\mathbb{V}[\hat{\mathbf{G}}_w]}}$  converges in distribution to a standard normal random variable.

## References

- [1] K. R. Moon and A. O. Hero III, “Ensemble estimation of multivariate f-divergence,” in *IEEE International Symposium on Information Theory*, pp. 356–360, 2014.
- [2] K. R. Moon and A. O. Hero III, “Ensemble estimation of multivariate f-divergence,” *CoRR*, vol. abs/1404.6230, 2014.
- [3] K. Sricharan, R. Raich, and A. O. Hero, “Estimation of nonlinear functionals of densities with confidence,” *IEEE Trans. Information Theory*, vol. 58, no. 7, pp. 4135–4159, 2012.
- [4] K. Sricharan, D. Wei, and A. O. Hero III, “Ensemble estimators for multivariate entropy estimation,” *IEEE Trans. Information Theory*, vol. 59, no. 7, pp. 4374–4388, 2013.
- [5] K. Sricharan, *Neighborhood graphs for estimation of density functionals*. PhD thesis, Univ. Michigan, 2012.
- [6] Y. Mack and M. Rosenblatt, “Multivariate k-nearest neighbor density estimates,” *Journal of Multivariate Analysis*, vol. 9, no. 1, pp. 1–15, 1979.
